# Supplementary material
Source: MDPI journal article supplement (https://www.mdpi.com/2673-4583/5/1/4)

# An Inkjet-printed amperometric H<sub>2</sub>S sensor for environmental applications

Franc Paré, Rebeca Ignacia Castro, Xavier Guimera, Gemma Gabriel, Mireia Baeza \*

\*[Mariadelmar.baeza@uab.cat](mailto:Mariadelmar.baeza@uab.cat)

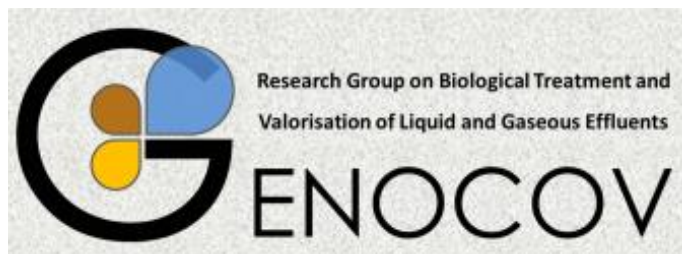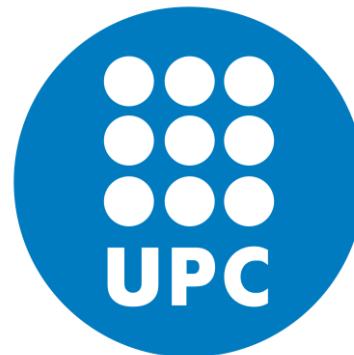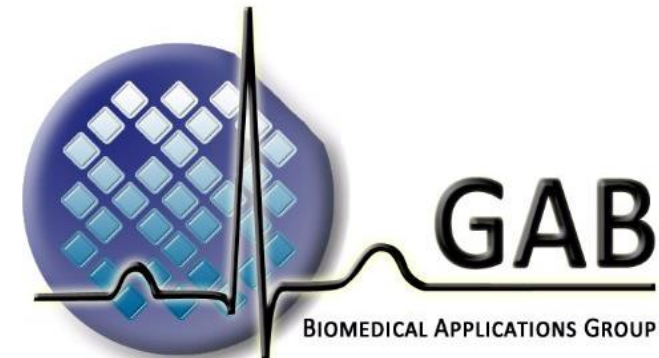

# Sulfur cycle

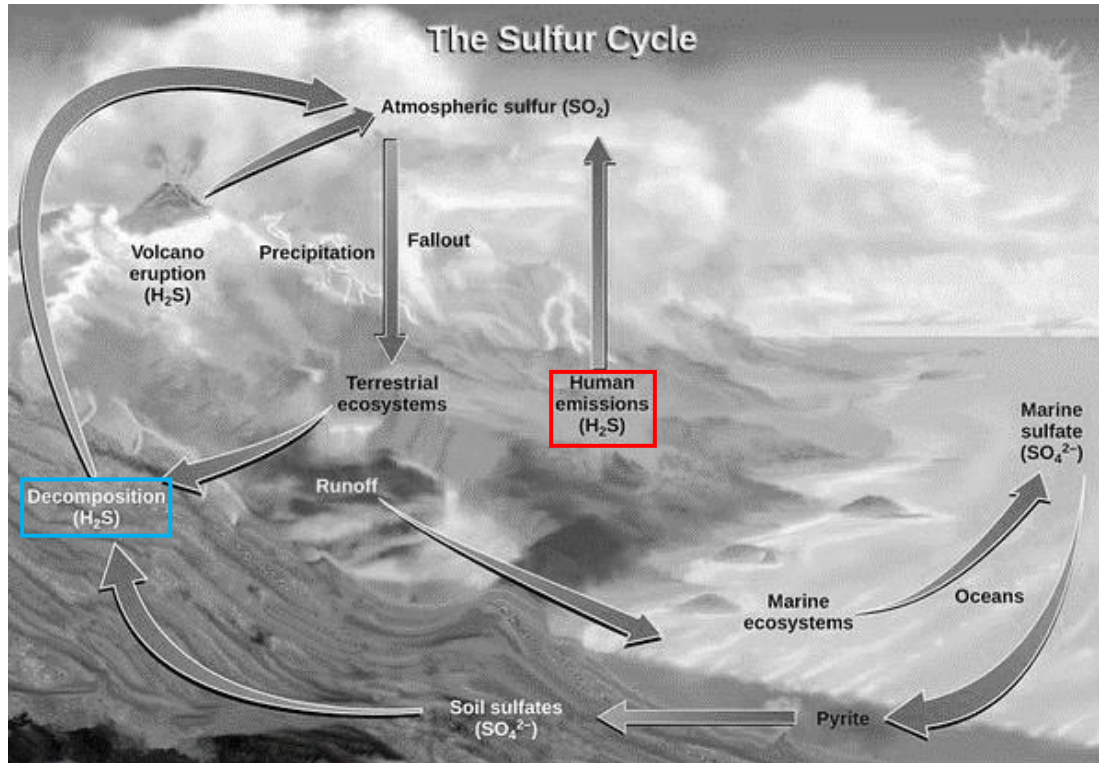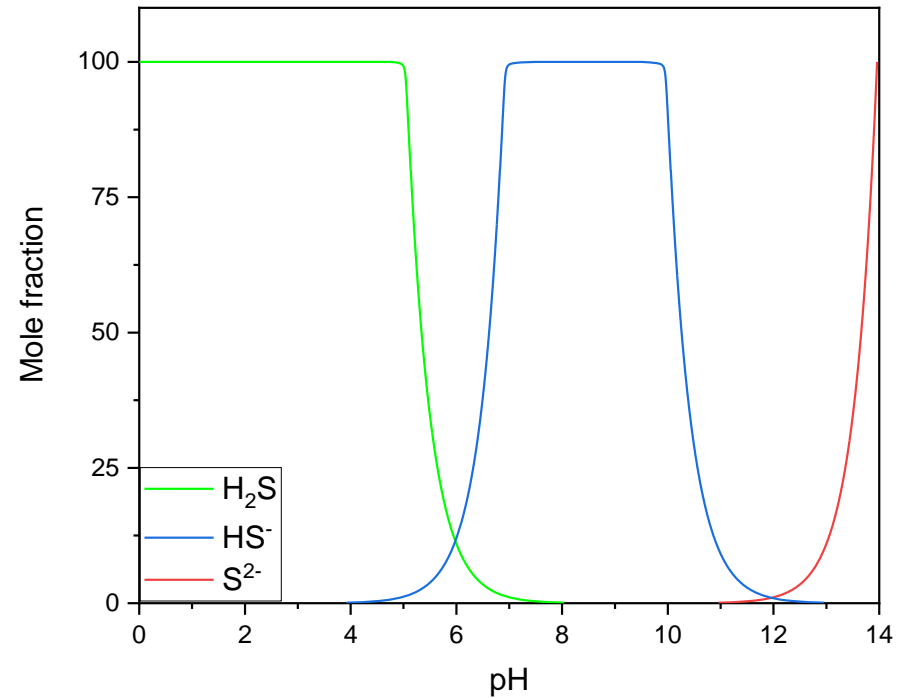

Sulfhydic acid is a polyprotic compound with labile protons. Given that, it coexists as different species with different proportions depending on the medium's pH.

# Design of the electrode

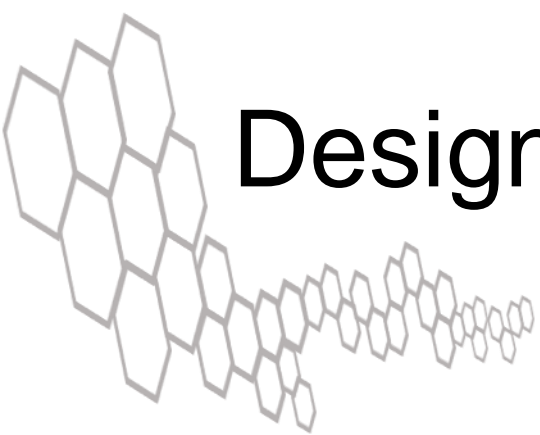

SWCNTs/SWCNTs-PVA

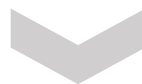

SU8

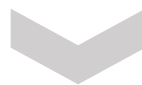

Au electrode

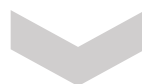

Ag tracks

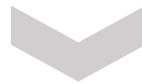

PET substrate

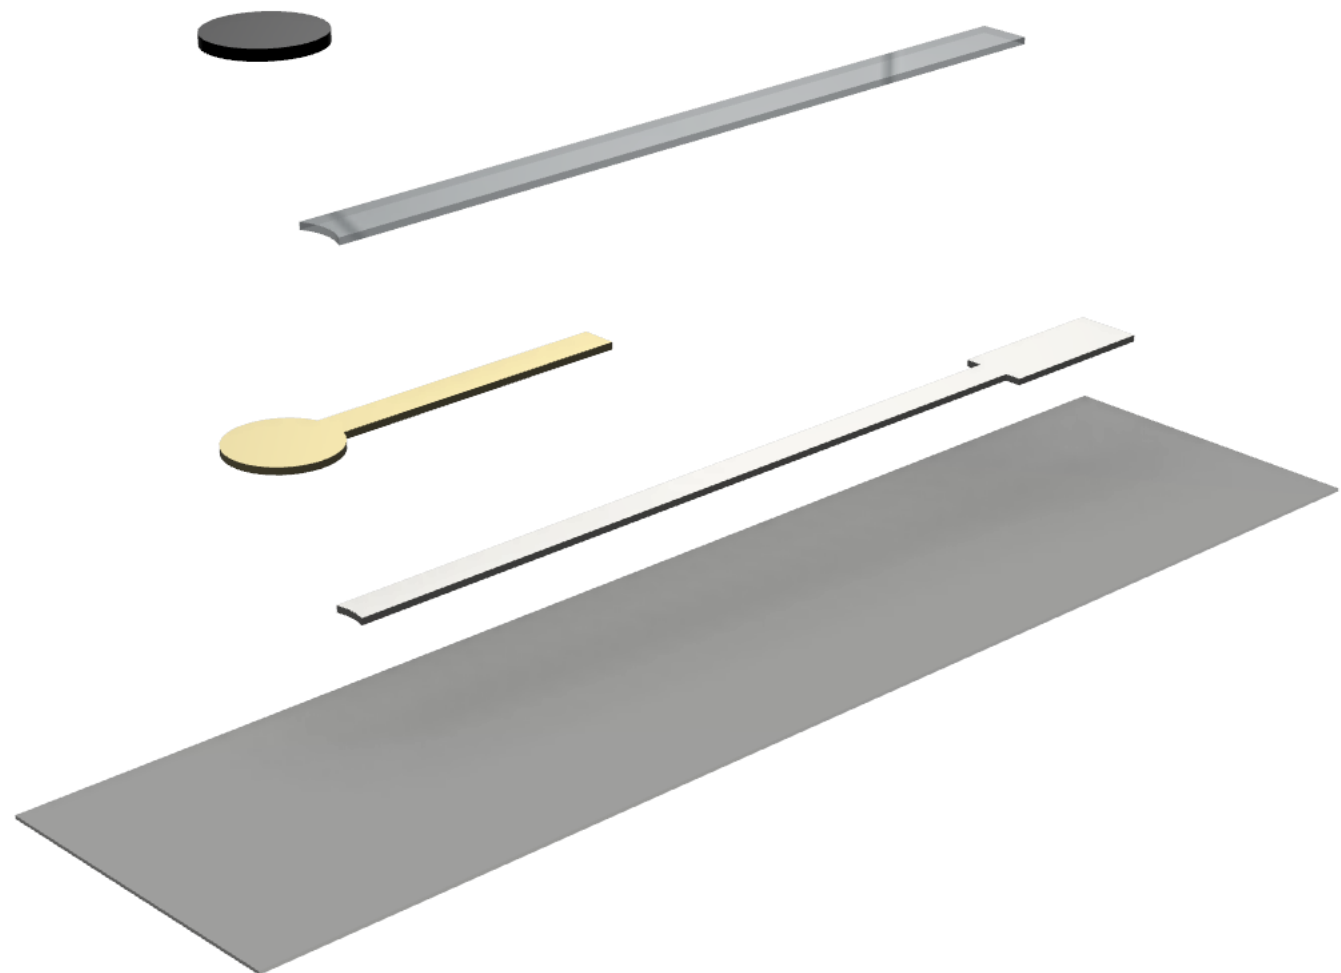

# Morphological characterization

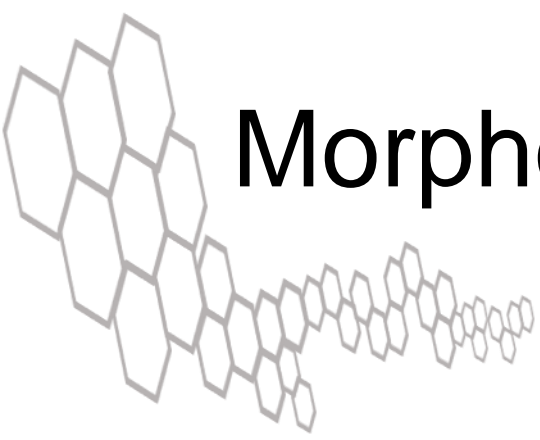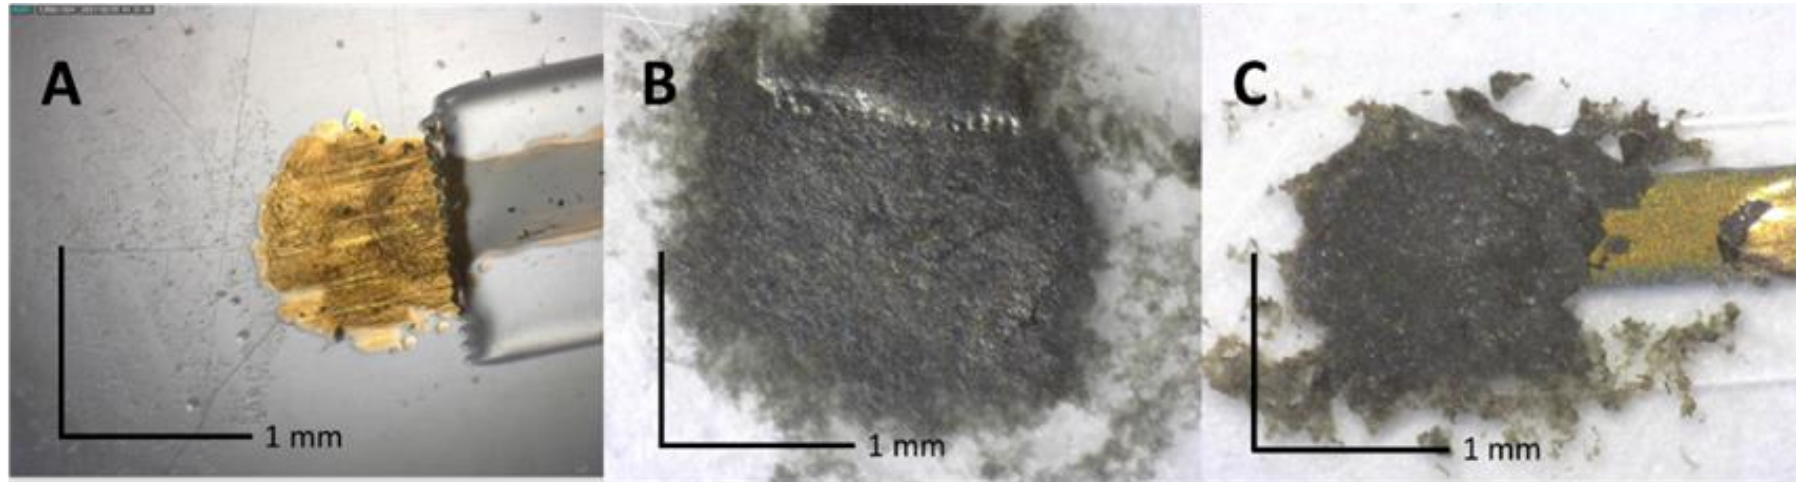

- A) Inkjet-printed Au electrode
- B) SWCNTs drop-casted over Au electrode
- C) Drop-casted SWCNTs-PVA over Au electrode.

# Technique basics

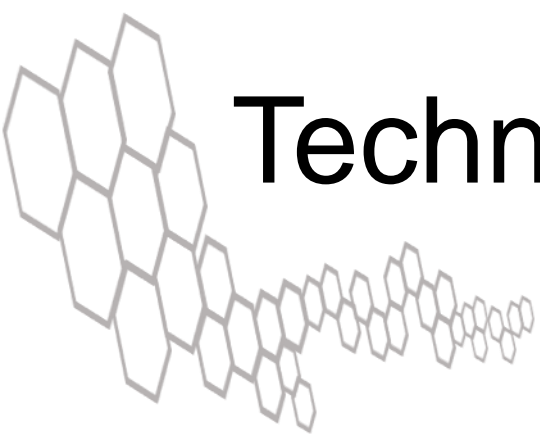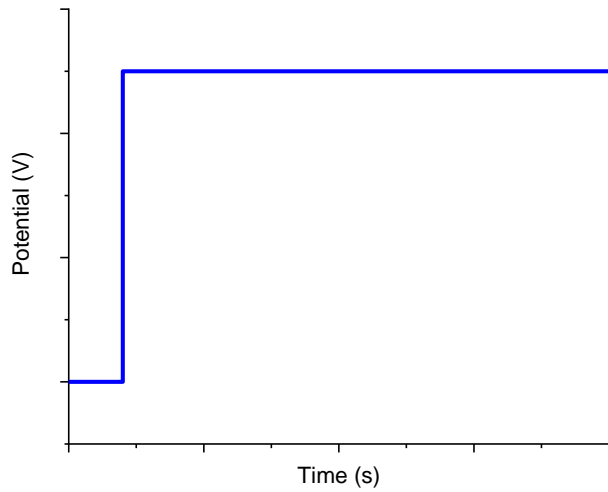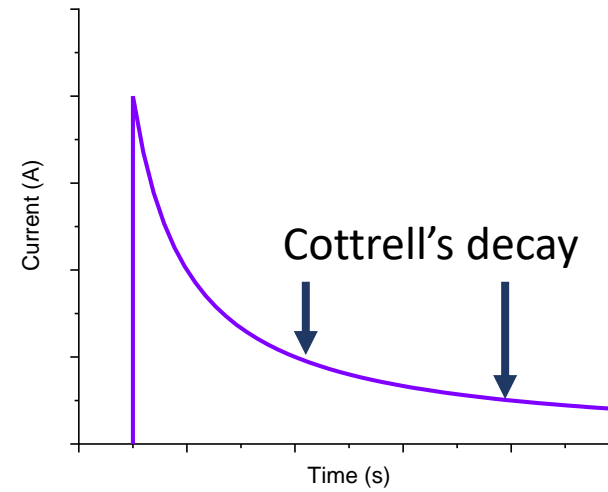

$$i = \frac{nFAc_j^0 \sqrt{D_j}}{\sqrt{\pi t}}$$

Measured at the same time, current has a linear correlation to analyte concentration.

# Electrochemical characterization

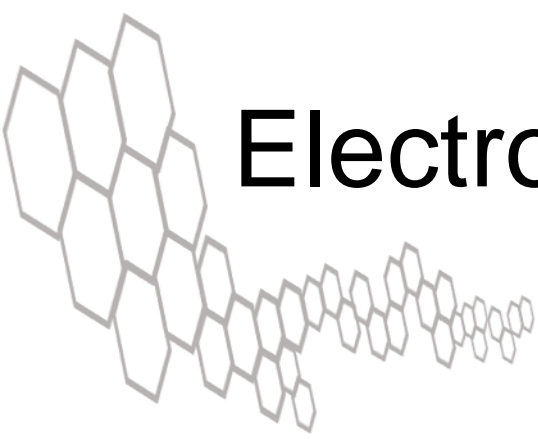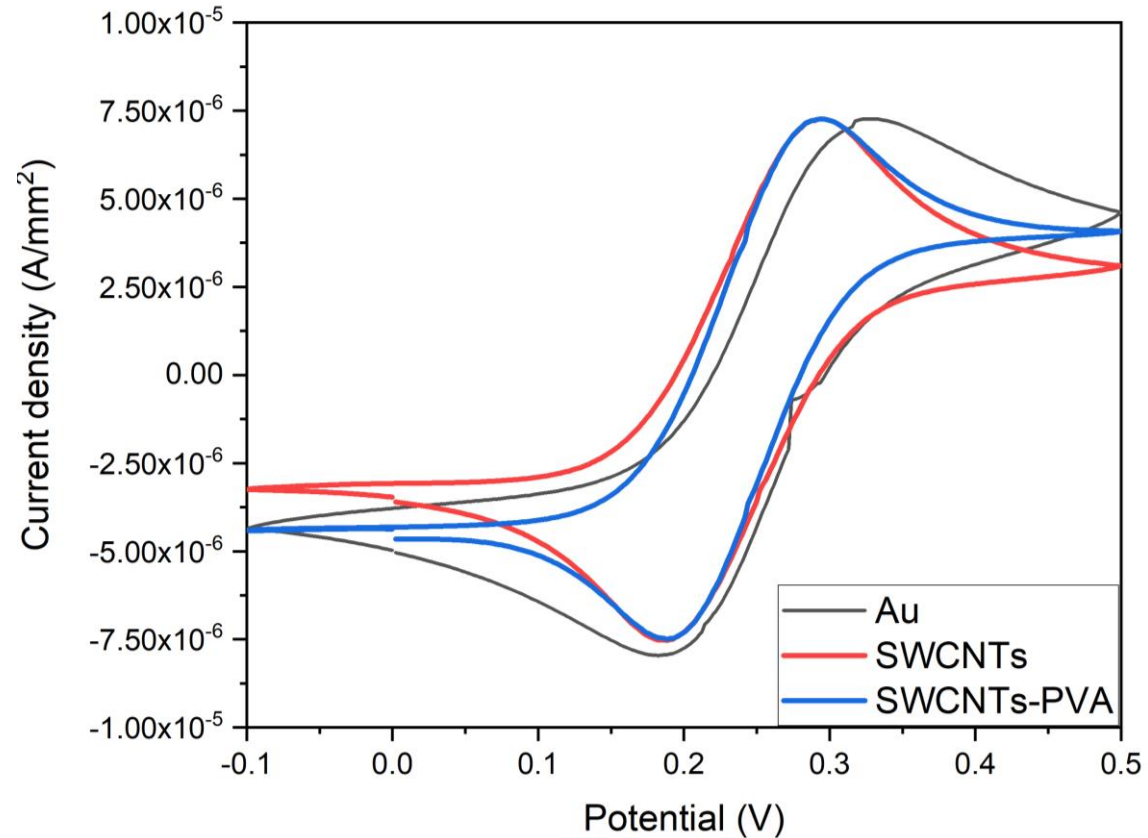

Modified electrodes presented similar current density and a smaller potential gap than Au bare electrodes

SWCNTs and SWCNTs-PVA are both favorable for an H<sub>2</sub>S sensor due to their capacity for lower oxidation potentials

Lowered rates of sulfur deposition on their surfaces due to the less favorable interaction S-C against S-Au



# Results: H<sub>2</sub>S sensor

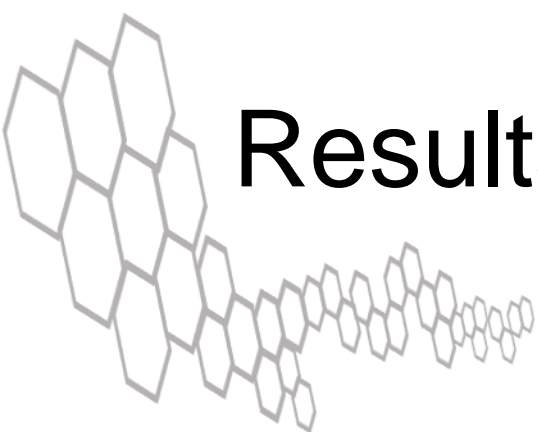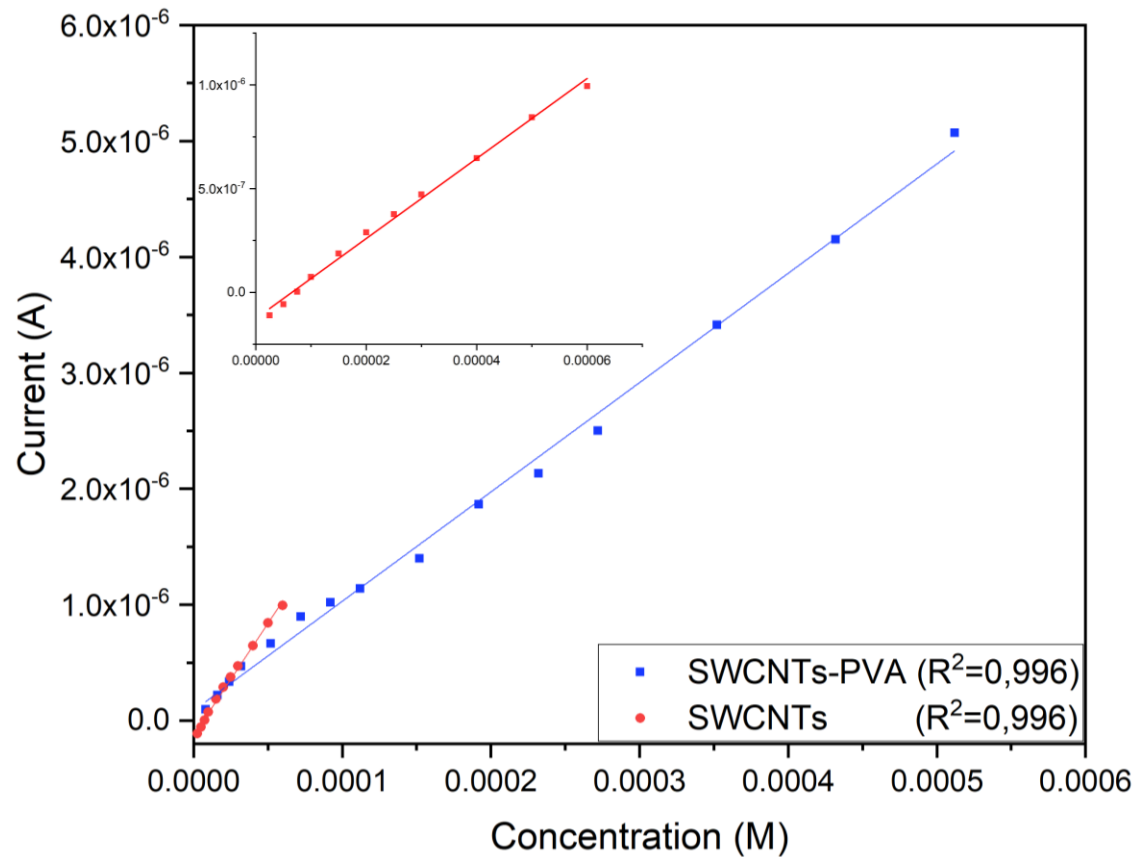

SWCNTs:  $(19.3 \pm 0.4)$  mA/M  
SWCNTs-PVA:  $(9.4 \pm 0.2)$  mA/M

SWCNTs can measure H<sub>2</sub>S concentrations from 8  $\mu$ M to 60  $\mu$ M, with a LD of 4.3  $\mu$ M

SWCNTs-PVA is capable of measuring H<sub>2</sub>S from 52  $\mu$ M to 512  $\mu$ M, with a LD of 34  $\mu$ M

# An Inkjet-printed amperometric H<sub>2</sub>S sensor for environmental applications

Thank you for your attention

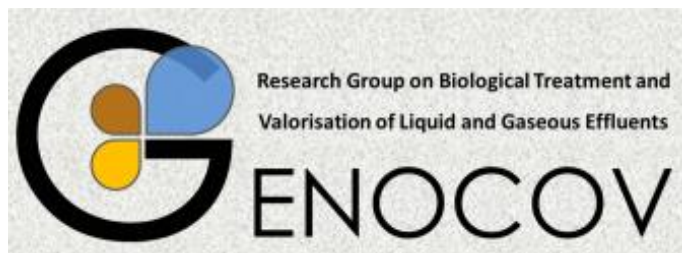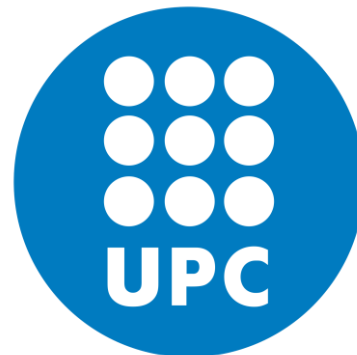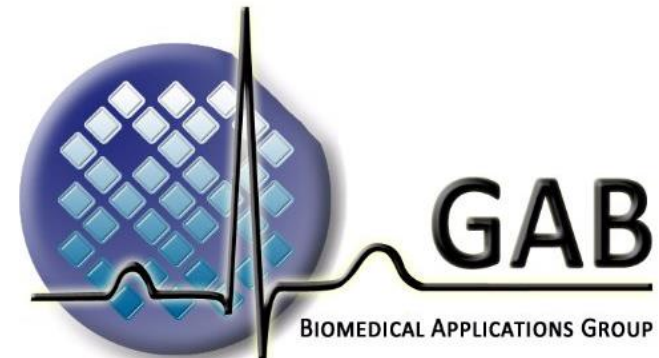

Supplement: s1 [file s1]
